# Supplementary material for: Understanding of chiral site-dependent enantioselective identification on a plasmon-free semiconductor based SERS substrate
Source: PubMed Central journal article supplement (PMC9172570; doi:10.1039/d2sc01938h), 2022-05-11
Supplement: SC-013-D2SC01938H-s001.pdf [file SC-013-D2SC01938H-s001.pdf]

## Supporting Information

### Understanding of chiral site-dependent enantioselective identification on plasmon-free semiconductor based SERS substrate

Jing Xu,<sup>a</sup> Yuanfei Xue,<sup>b</sup> Xiaoxia Jian,<sup>a</sup> Yue Zhao,<sup>a</sup> Zhenqing Dai,<sup>a</sup> Jingwen Xu,<sup>a</sup> Zhida Gao,<sup>a</sup> Ye Mei\*<sup>b</sup> and Yan-Yan Song\*<sup>a</sup>

<sup>a</sup>College of Sciences, Northeastern University, Shenyang 110819, China

<sup>b</sup>State Key Laboratory of Precision Spectroscopy, School of Physics and Electronic Science, East China Normal University, Shanghai 200062, China; NYU-ECNU Center for Computational Chemistry at NYU Shanghai, Shanghai 200062, China; Collaborative Innovation Center of Extreme Optics, Shanxi University, Taiyuan, Shanxi 030006, China

#### Corresponding Authors

\* Yan-Yan Song, E-mail: yysong@mail.neu.edu.cn.

\* Ye Mei, E-mail: ymei@phy.ecnu.edu.cn.

## EXPERIMENTAL SECTION

**Materials and Reagents.** Ti sheets (~0.1 mm thickness, 99.6% purity) were purchased from Baosheng Hardware (Baoji, China). Phenylphosphonic acid ( $C_6H_7O_3P$ ), o-phosphorylethanolamine ( $C_2H_8NO_4P$ ), tryptophan ( $C_{11}H_{12}N_2O_2$ ), phenylalanine ( $C_9H_{11}NO_2$ ), 3,4-Dihydroxy-L/D-phenylalanine ( $C_9H_{11}NO_4$ ), histidine ( $C_6H_9N_3O_2$ ), potassium ferrocyanide trihydrate ( $K_4FeC_6N_6 \cdot 3H_2O$ ), and iron chloride hexahydrate ( $FeCl_3 \cdot 6H_2O$ ) were purchased from Aladdin (Shanghai, China). N-Hydroxysuccinimide (NHS) and N-(3-Dimethylaminopropyl)-3-ethylcarbodiimide hydrochloride (EDC) were obtained from Sigma-Aldrich (St. Louis, USA). Other reagents including ammonium fluoride ( $NH_4F$ ), isopropyl alcohol, ethylene glycol, and lactic acid were purchased from Sinopharm Chemical Reagent Co. Ltd. and used as received without further purification.

**Apparatus and Characterization.** Morphological and microstructures characterization were carried out using a field-emission scanning electron microscope (SEM, Hitachi SU8000, Japan). SERS measurements were conducted using a Raman microscopy spectrometer (LabRAM HR, HORIBA Scientific, France). XRD patterns were acquired using an X'Pert XRD spectrometer (Philips, USA) using a  $CuK\alpha$  X-ray source. X-ray photoelectron spectra (XPS) were recorded on a Perkin-Elmer Physical Electronics 5600 spectrometer using  $AlK\alpha$  radiation at 13 kV as excitation source. UV-visible diffuse reflectance spectra were obtained using a Perkin-Elmer spectrometer (Lambda 750S, USA). Ultraviolet visible (UV/Vis) diffuse reflectance spectra were recorded using a Lambda Bio/XLS+ UV-vis spectrophotometer (PerkinElmer, USA) with a 1.0 cm optical path.

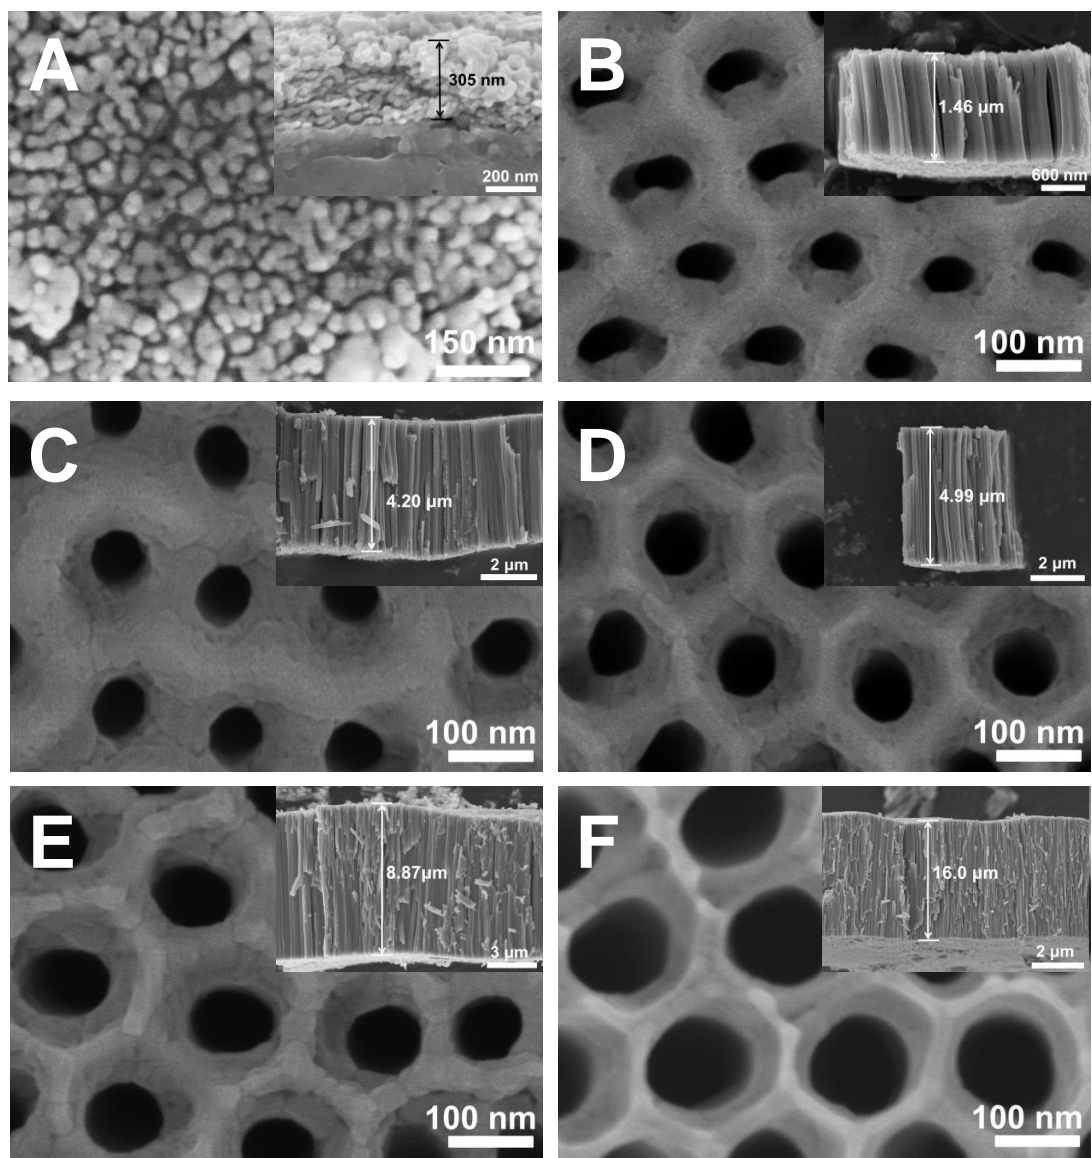

**Fig. S1.** SEM images of top view and side view of (A) TiO<sub>2</sub> nanoparticles based membrane, and TiO<sub>2</sub> NTs prepared with different anodization periods: (B) 1 min, (C) 2 min, (D) 3 min, (E) 4 min, and (F) 10 min.

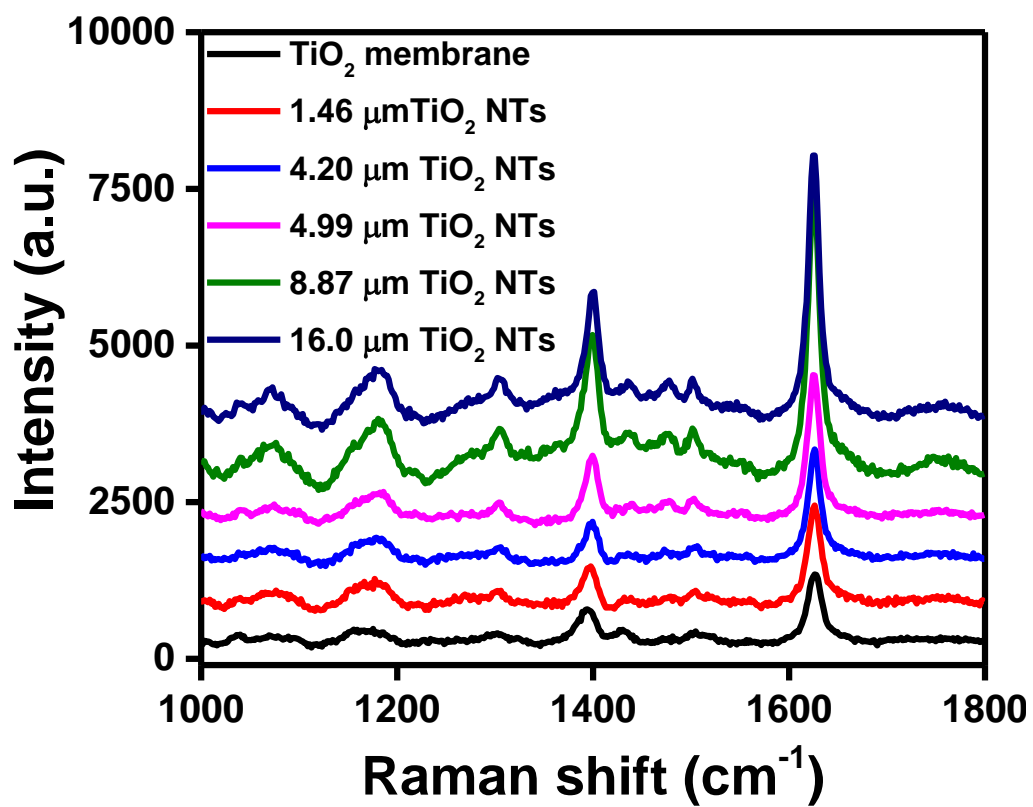

**Fig. S2.** SERS spectra of MB adsorbed on TiO<sub>2</sub> NTs with different lengths.

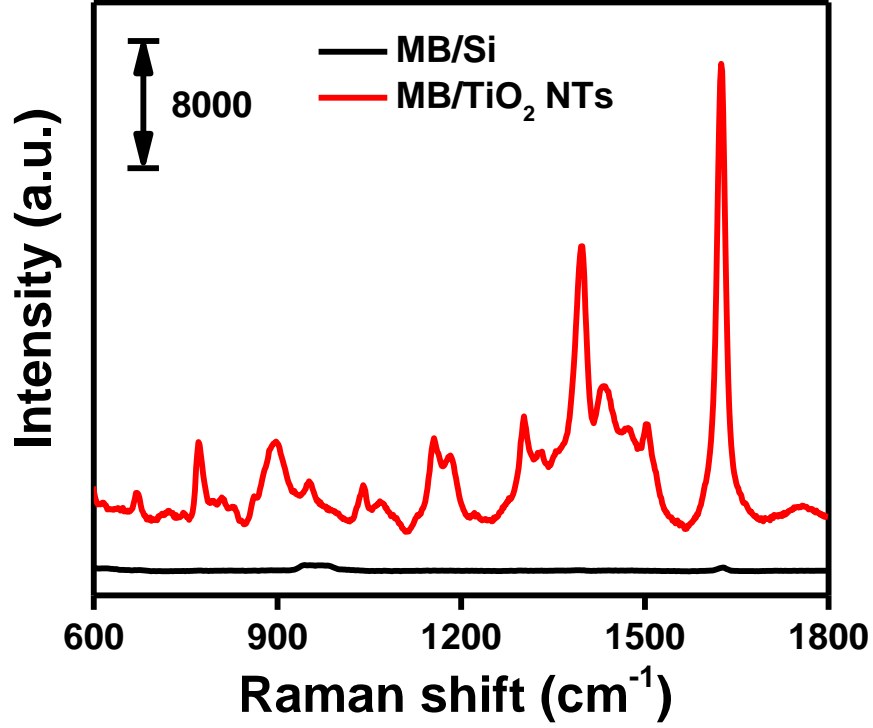

**Fig. S3.** Raman spectra of MB adsorbed on different substrates: silicon wafer and TiO<sub>2</sub> NTs.

The enhancement factor (EF) of TiO<sub>2</sub> NTs was evaluated using Eq 1.<sup>S1</sup>  $I_{SERS}$  and  $I_{bulk}$  are the intensities of the 1628 cm<sup>-1</sup> (C-C stretching vibration) band of MB adsorbed on a SERS-active substrate and bare silicon wafer, respectively.  $N_{bulk}$  and  $N_{SERS}$  are the average number of molecules in the scattering area for non-SERS and SERS measurements. In this study, the number of probe molecules was estimated using Eq. 2 based on the assumption that the probed molecules were distributed uniformly on the substrates.  $N_A$  is the Avogadro constant;  $C$  is the molar concentration of the probe solution;  $V$  is the volume of a droplet; and  $S_{sub}$  is the area of the substrate.

$$EF = \left( \frac{I_{SERS}}{I_{bulk}} \right) \left( \frac{N_{bulk}}{N_{SERS}} \right) \quad (1)$$

$$N = CVN_A S_{sub} \quad (2)$$

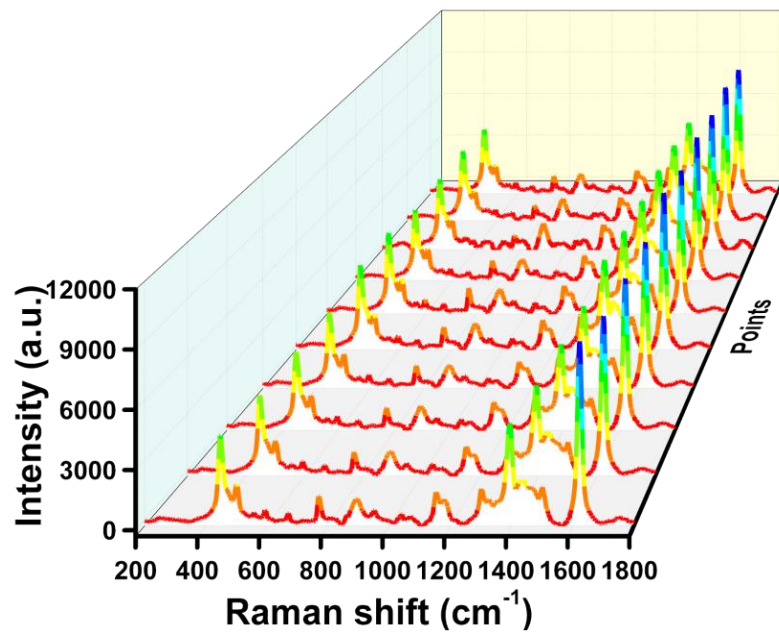

**Fig. S4.** SERS spectra of  $2 \times 10^{-5}$  M MB acquired on ten pieces of TiO<sub>2</sub> NTs.

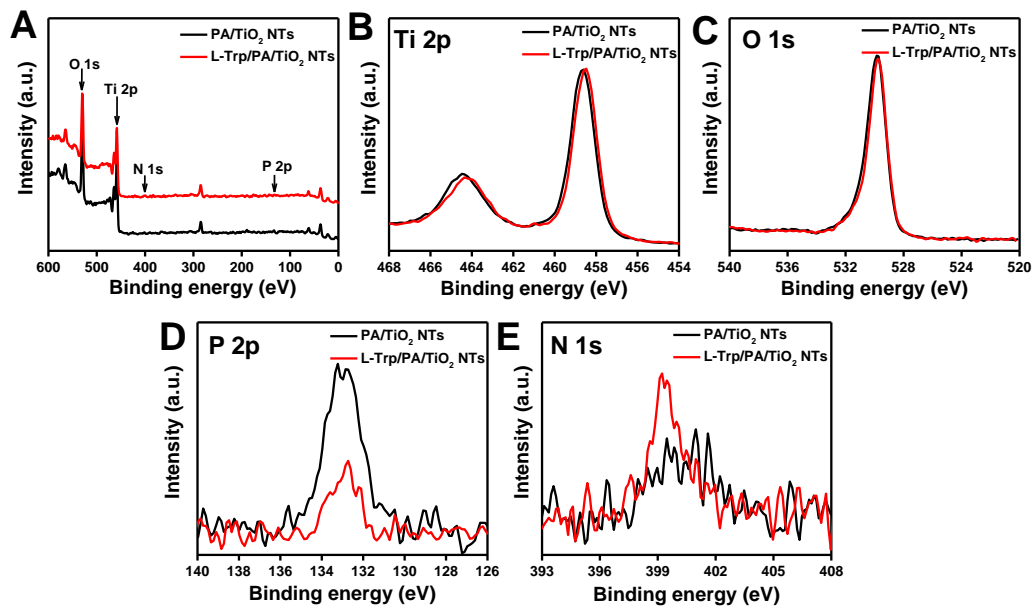

**Fig. S5.** (A) XPS survey spectra of PA/TiO<sub>2</sub> NTs before and after L-Trp modification. (B) Ti 2p signal, (C) O 1s signal, (D) P 2p signal, and (E) N 1s signal before and after L-Trp modified onto PA/TiO<sub>2</sub> NTs.

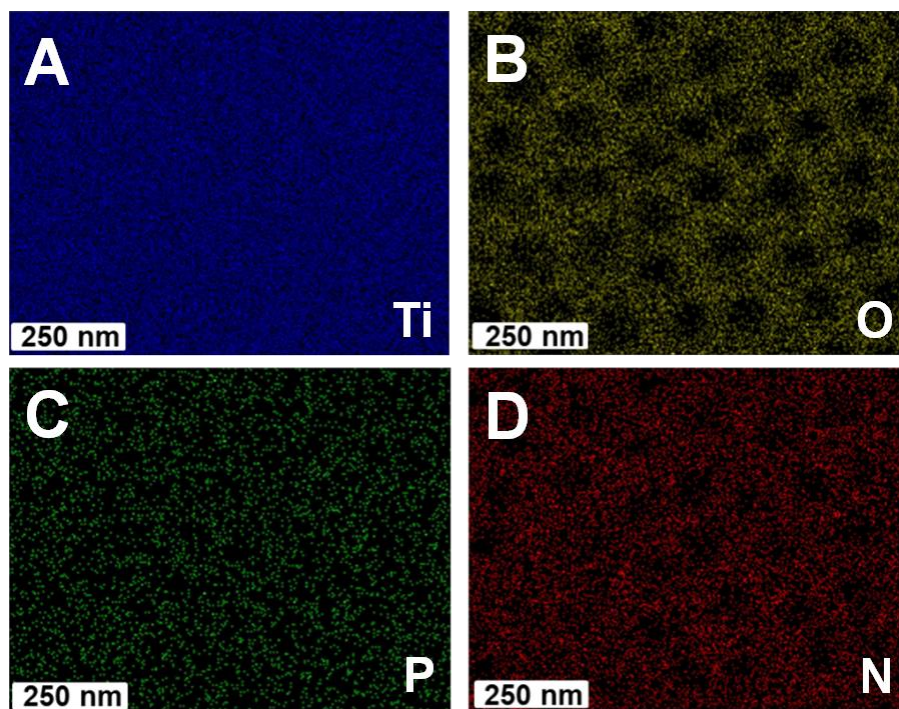

**Fig. S6.** The energy-dispersive X-ray spectroscopy (EDS) mapping images of L-Trp/PA/TiO<sub>2</sub> NTs.



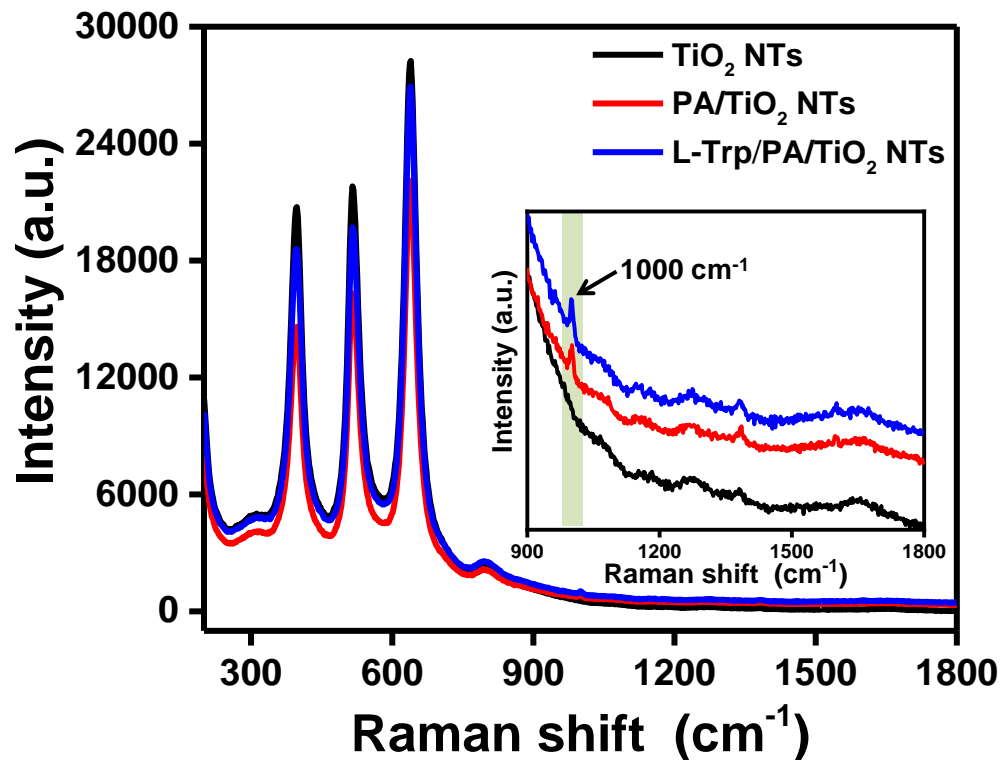

**Fig. S7.** Raman spectra of TiO<sub>2</sub> NTs, PA/TiO<sub>2</sub> NTs, and L-Trp/PA/TiO<sub>2</sub> NTs.

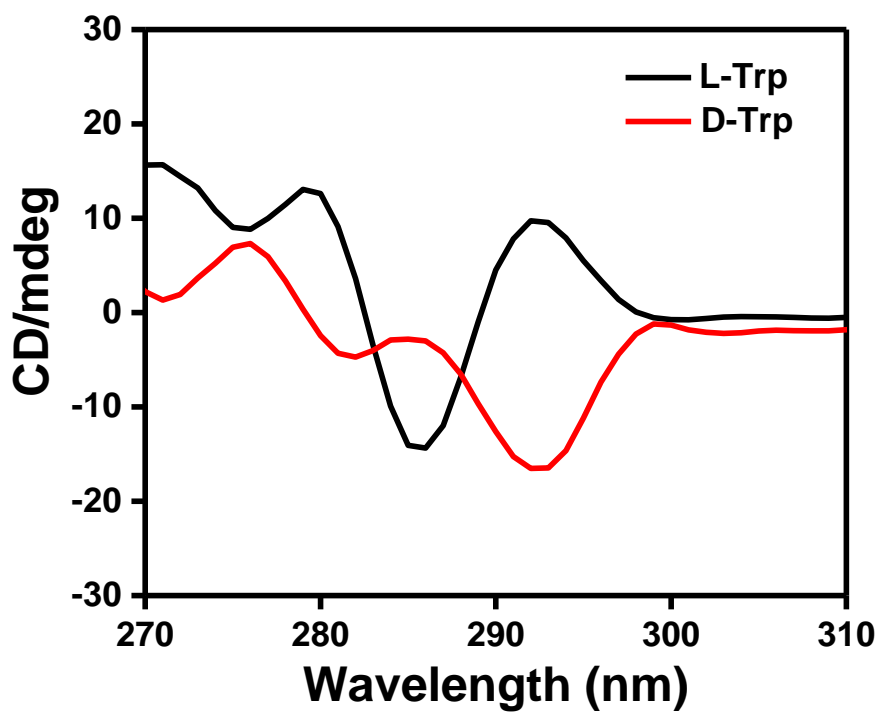

**Fig. S8.** CD spectra of L/D-Trp.

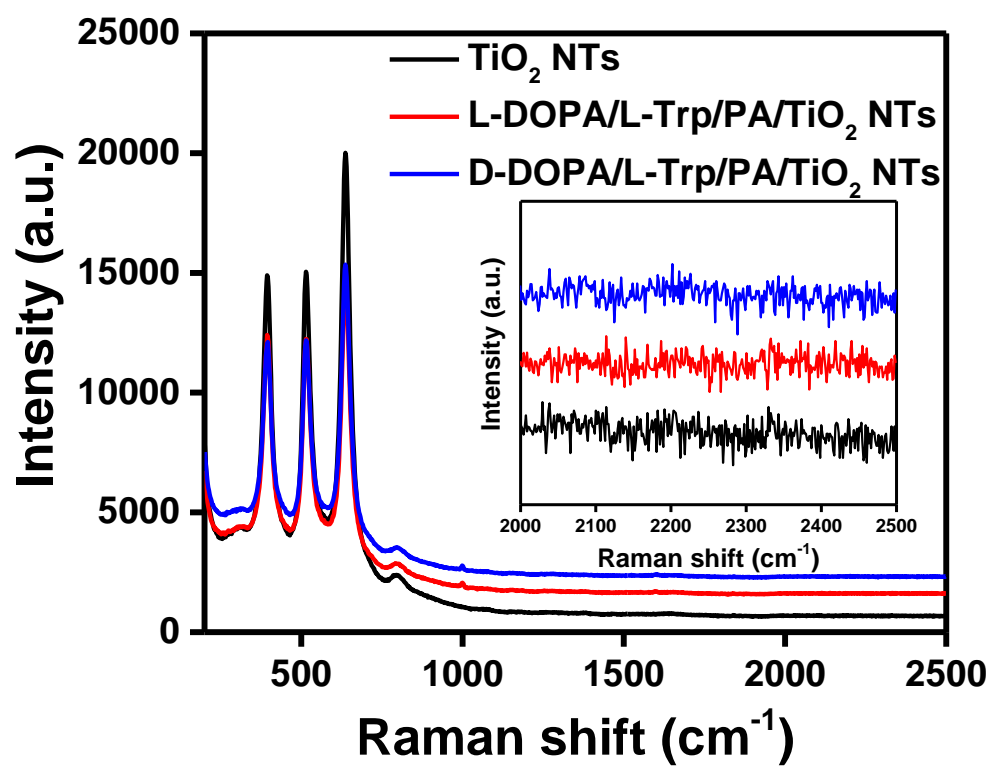

**Fig. S9.** Raman spectra of TiO<sub>2</sub> NTs, L-DOPA/L-Trp/PA/TiO<sub>2</sub> NTs, and D-DOPA/L-Trp/PA/TiO<sub>2</sub> NTs.

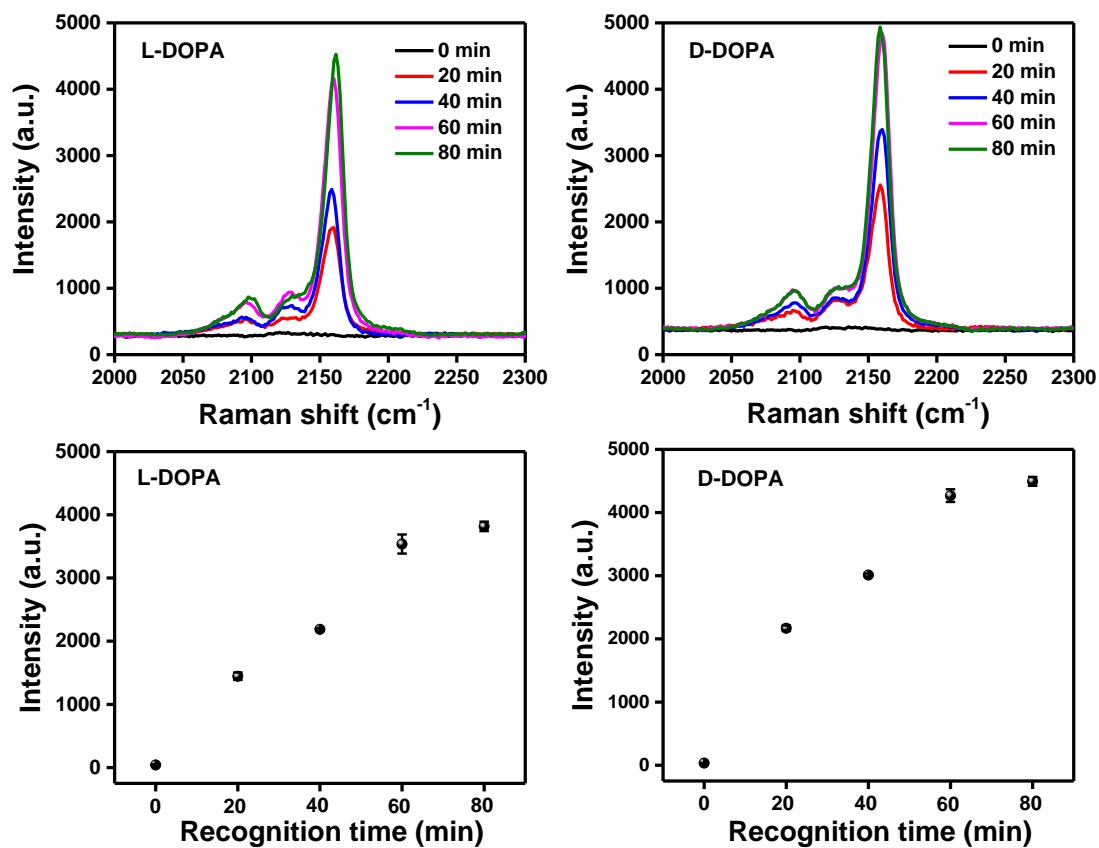

**Fig. S10.** SERS spectra for sensing (A) L-DOPA and (B) D-DOPA under different recognition time periods. The corresponding Raman intensity for sensing (C) L-DOPA and (D) D-DOPA.

As shown in Fig. S10, the Raman peak intensity at 2158 cm<sup>-1</sup> increases with the chiral recognition time, and this trend slows down at 60 min.

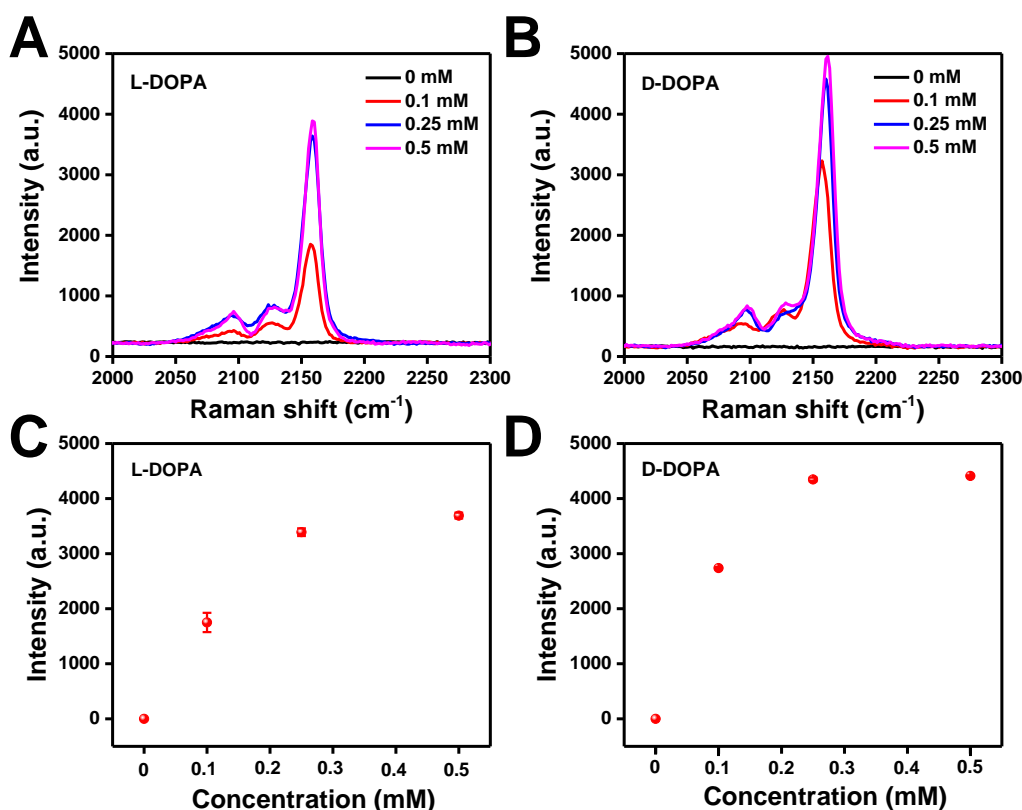

**Fig. S11.** SERS spectra for sensing (A) L-DOPA and (B) D-DOPA under different Fe<sup>3+</sup> concentrations. The corresponding Raman intensity for sensing (C) L-DOPA and (D) D-DOPA.

It can be seen that the SERS signals of PB increased with Fe<sup>3+</sup> concentration for L-DOPA and D-DOPA. The SERS signal intensity reached a plateau at a Fe<sup>3+</sup> concentration of 0.25 mM for both cases. At this high concentration of Fe<sup>3+</sup>, the reaction has nearly completed. Further increasing the concentration of Fe<sup>3+</sup> does not shift the equilibrium too much (The intensity of the signal does not increase with higher concentration of Fe<sup>3+</sup>). As shown in Fig. S11, the SERS substrate with D-DOPA consistently shows a larger PB signal than that of L-DOPA with any concentration of Fe<sup>3+</sup>, suggesting more D-DOPA molecules were captured on the SERS substrate. This result was in agreement with the MD simulation.

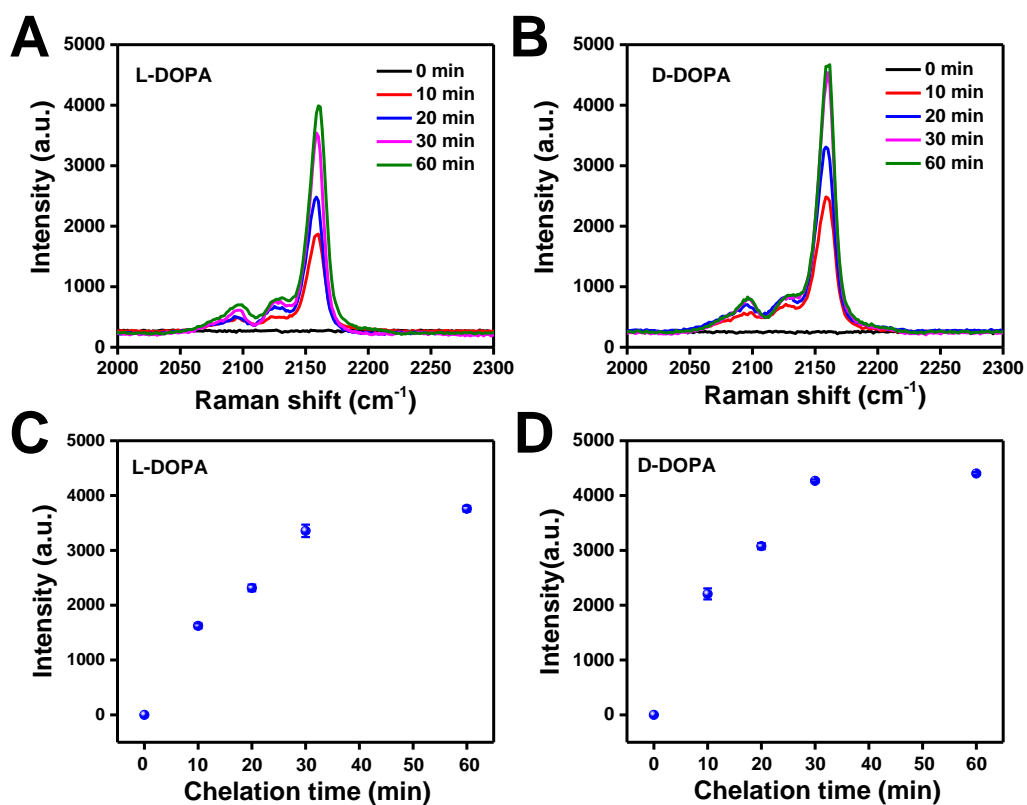

**Fig. S12.** SERS spectra for sensing (A) L-DOPA and (B) D-DOPA under different  $\text{Fe}^{3+}$  chelation time periods. The corresponding Raman intensity for sensing (C) L-DOPA and (D) D-DOPA.

As shown in Fig. S12, the changes in Raman peak intensity are also influenced by  $\text{Fe}^{3+}$  chelation time, and a stable value was achieved in 30 min.

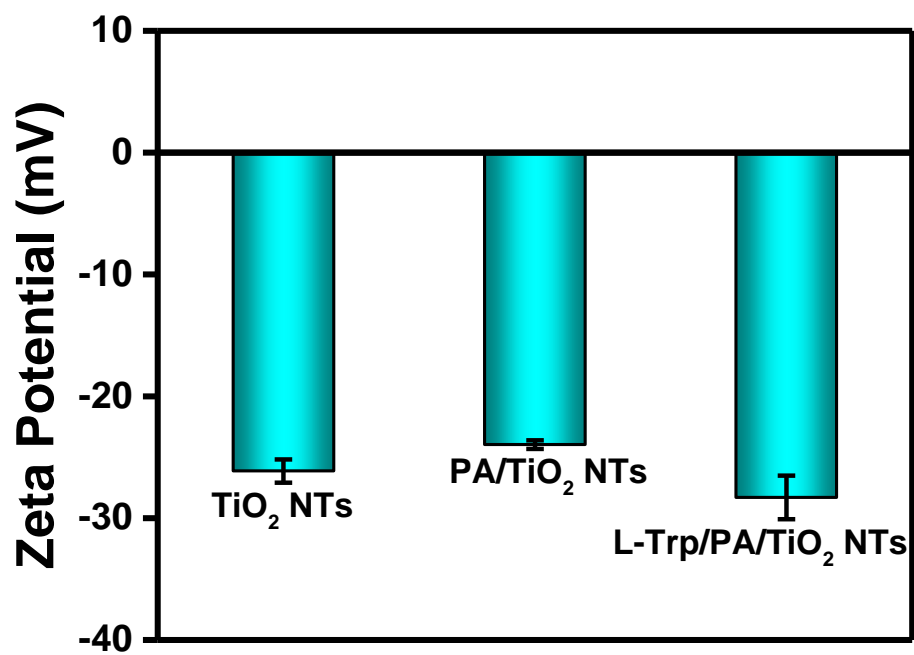

**Fig. S13.** Zeta potentials of TiO<sub>2</sub> NTs, PA/TiO<sub>2</sub> NTs, and L-Trp/PA/ TiO<sub>2</sub> NTs.

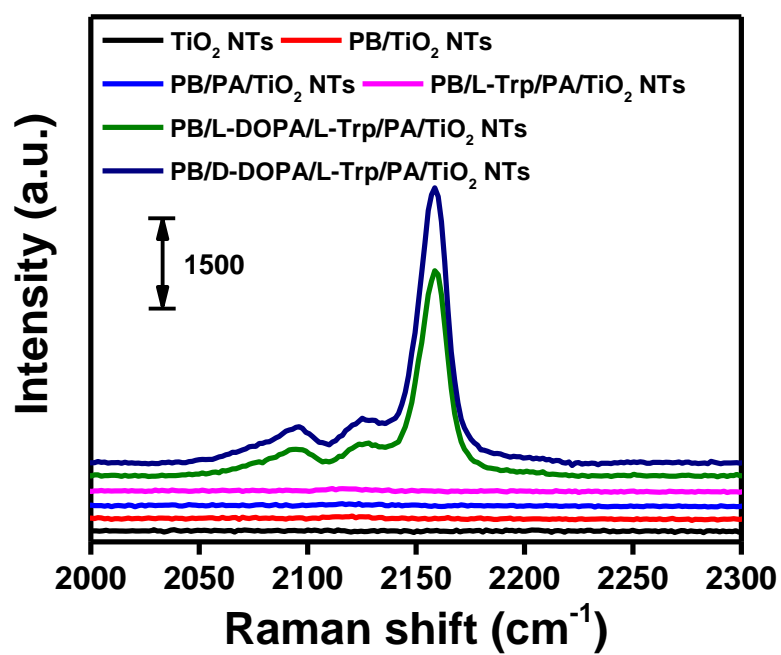

**Fig. S14.** SERS spectra of TiO<sub>2</sub> NTs, PB/TiO<sub>2</sub> NTs, PB/PA/TiO<sub>2</sub> NTs, PB/L-Trp/PA/TiO<sub>2</sub> NTs, PB/L-DOPA/L-Trp/PA/TiO<sub>2</sub> NTs, and PB/D-DOPA/L-Trp/PA/TiO<sub>2</sub> NTs.



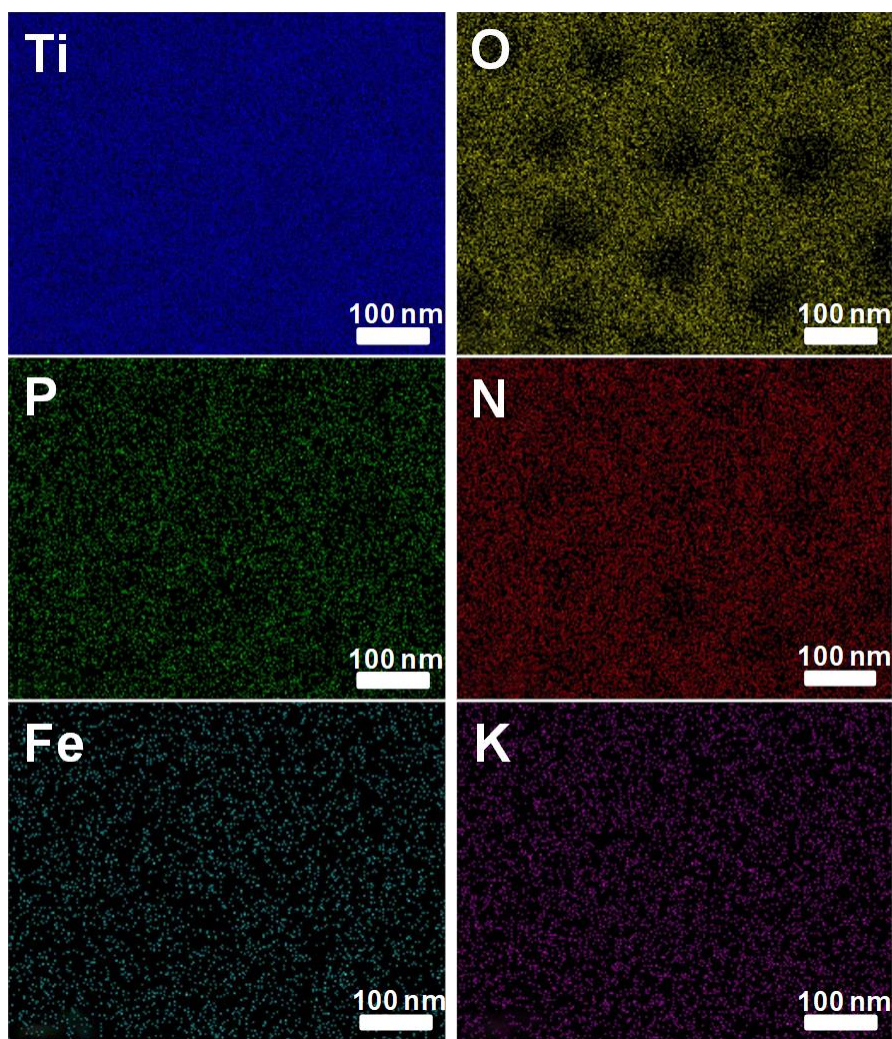

**Fig. S15.** EDS elemental mapping images of generated PB *via* DOPA recognition on L-Trp/PA/TiO<sub>2</sub> NTs.

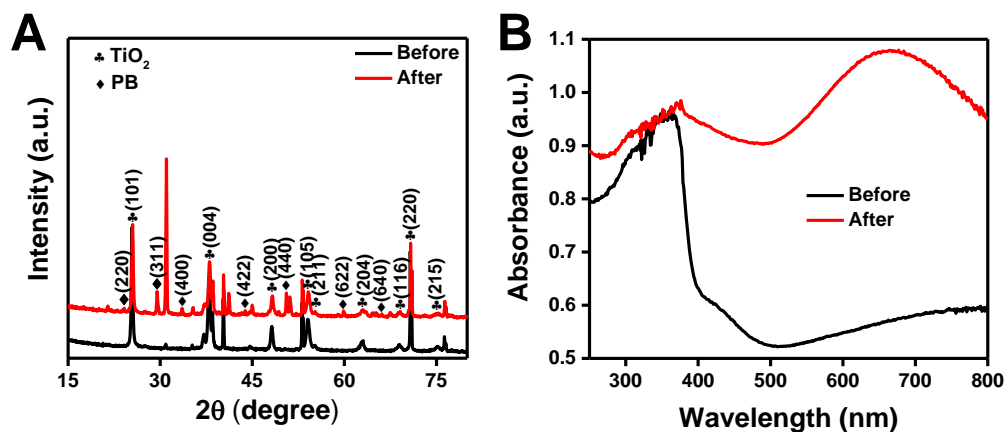

**Fig. S16.** (A) X-ray diffraction (XRD) patterns and (B) UV/Visible diffuse reflectance spectra of homochiral SERS substrate before and after PB generation.

The peaks appeared at  $24.1^\circ$  (220),  $29.5^\circ$  (311),  $33.5^\circ$  (400),  $43.8^\circ$  (422),  $50.6^\circ$  (440),  $59.9^\circ$  (622), and  $66.1^\circ$  (640), which can be indexed as the PB cubic space group  $Fm\bar{3}m$  (JCPDS card no. 73-0687).<sup>S2</sup>

The UV-visible absorbance spectra verify the formation of PB *via* the broad absorbance band appearing from 480 nm to 800 nm, which can be attributed to the intermetal charge-transfer band from Fe(II) to Fe(III) in PB.<sup>S3</sup>

**Table S1.** Comparison of various methods for detection of L/D-DOPA.

| Method                                                                                  | Mechanisms                                                                                                                                                       | Sensitivity data                          | Reference |
|-----------------------------------------------------------------------------------------|------------------------------------------------------------------------------------------------------------------------------------------------------------------|-------------------------------------------|-----------|
| L/D-cysteine modified gold nanoparticle based colorimetric assay                        | L/D-Cys as chiral selectors and Au NPs as artificial enzyme for enantioselective recognition of L/D-DOPA                                                         | 1 $\mu$ M                                 | S4        |
| L/D-tartaric acid grafted optical fiber probe based plasmon absorption bands shifts     | Hydrogen bonding induced wavelength shift of plasmonic metal.                                                                                                    | 10 nM                                     | S5        |
| Gold nanodendrite modified glassy carbon electrode based differential pulse voltammetry | DOPA enantiomers were distinguished by a noticeable potential difference                                                                                         | 0.25 $\mu$ M                              | S6        |
| Homochiral metal-organic frameworks based photoelectrochemical assay                    | the charge-carrier separation-induced photocurrent variation                                                                                                     | 0.24 $\mu$ M                              | S7        |
| Chiral CuO/CoO nanofibers based electrochemiluminescence method                         | CuO/CoO NFs as the catalytic activity center and chiral cysteine as the inducer of chiral recognition for enantioselective catalysis and recognition of L/D-DOPA | 0.29 nM for L-DOPA;<br>0.31 nM for D-DOPA | S8        |
| Signal amplification based SERS assay                                                   | Hydrogen-bonding interactions were amplified through the onsite growth of Prussian blue                                                                          | 0.13 pM for L-DOPA;<br>0.17 pM for D-DOPA | This work |

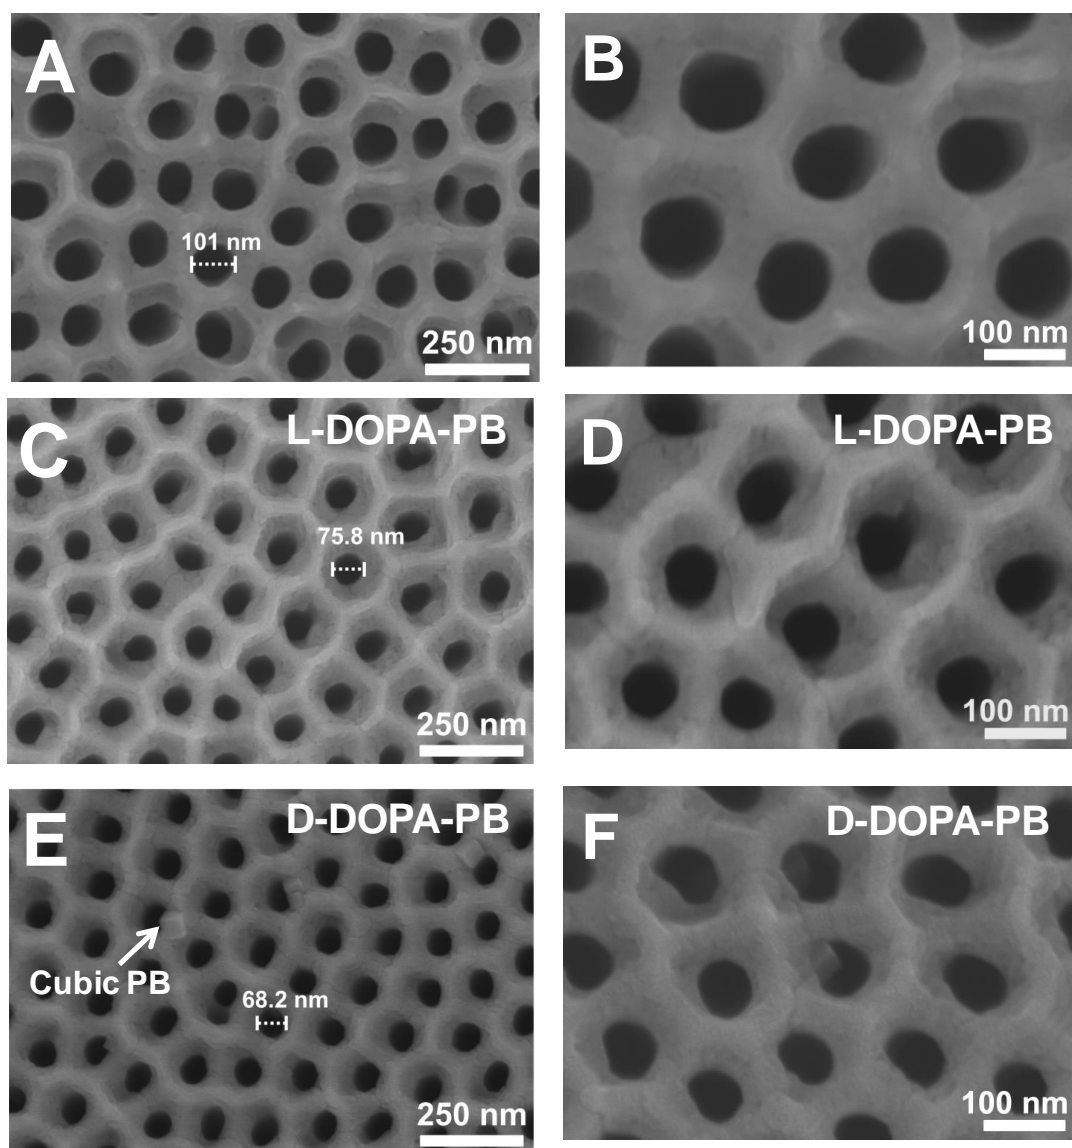

**Fig. S17.** SEM images of (A, B) bare substrate, (C, D) PB coated by L-DOPA recognition, and (E, F) PB coated by D-DOPA recognition.

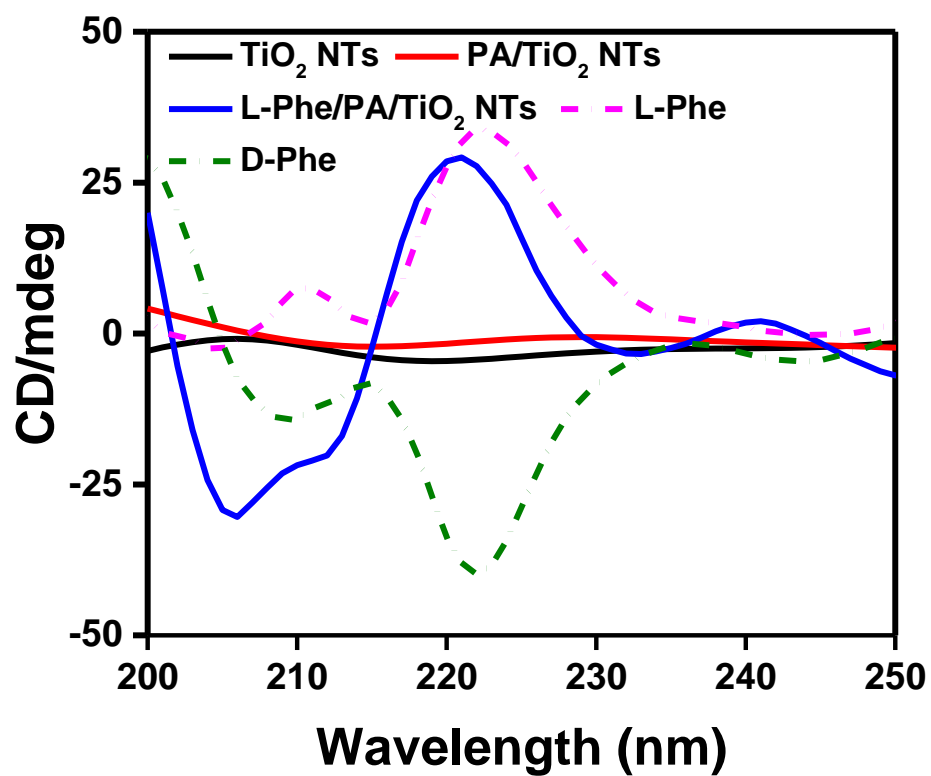

**Fig. S18.** CD spectra of TiO<sub>2</sub> NTs, PA/TiO<sub>2</sub> NTs, L-Phe/PA/TiO<sub>2</sub> NTs, and L/D-Phe.

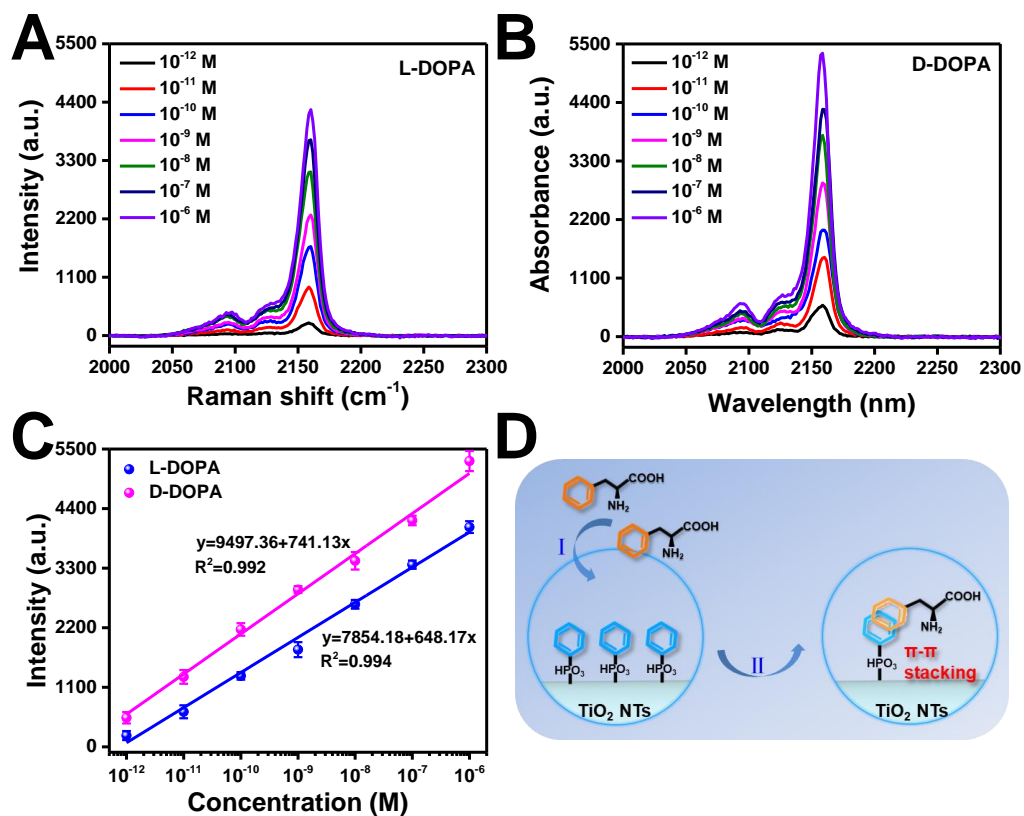

**Fig. S19.** SERS spectra of PB for sensing different concentrations of (A) L-DOPA and (B) D-DOPA on L-Phe/PA/TiO<sub>2</sub> NTs. (C) The corresponding Raman intensities at 2158  $\text{cm}^{-1}$ . (D) Mechanism for anchoring L-Phe onto PA/TiO<sub>2</sub> NTs.

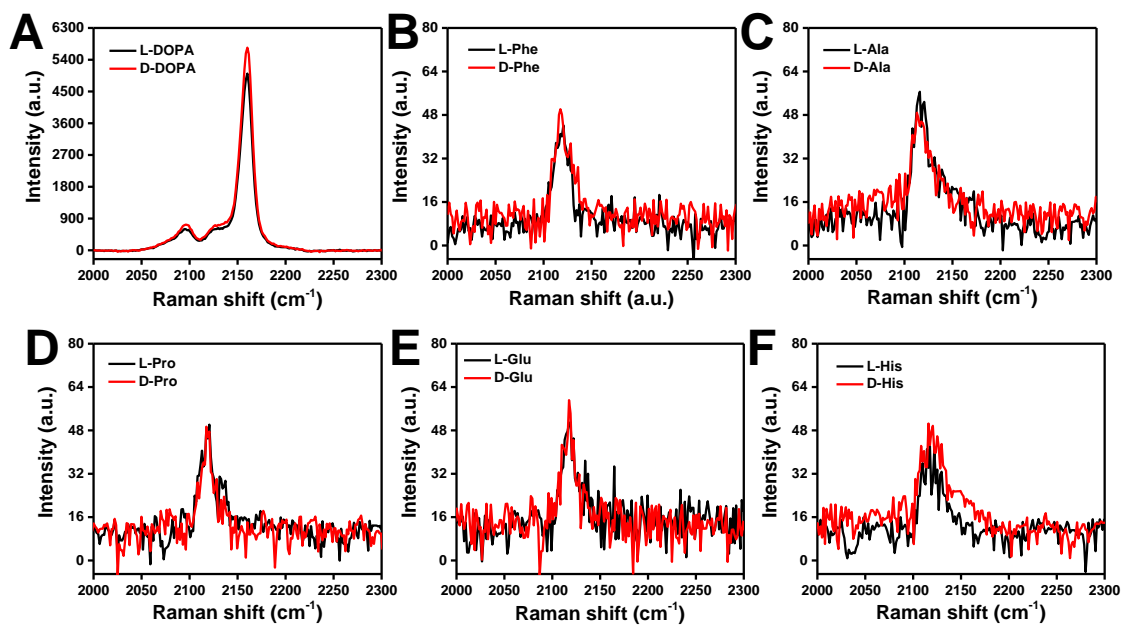

**Fig. S20.** SERS spectra of PB for sensing different enantiomers (A) L/D-DOPA, (B) L/D-Phe, (C) L/D-Ala, (D) L/D-Pro, (E) L/D-Glu, and (F) L/D-His.

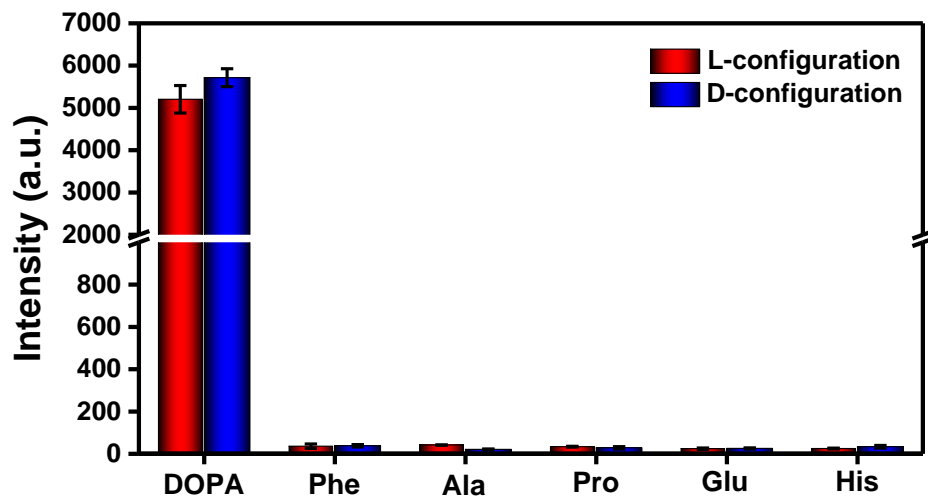

**Fig. S21.** Raman intensity at  $2158\text{ cm}^{-1}$  towards different enantiomers. Error bars indicate the standard deviation of triplicate tests. The concentration of each enantiomer is 1 mM.



## REFERENCES

- (S1) J. Xu, H. He, X. Jian, K. Qu, J. Xu, C. Li, Z. Gao and Y.-Y. Song, *Anal. Chem.*, 2021, **93**, 9286–9295.
- (S2) Z. Qin, B. Chen, Y. Mao, C. Shi, Y. Li, X. Huang, F. Yang and N. Gu, *ACS Appl. Mater. Interfaces*, 2020, **12**, 57382–57390.
- (S3) Y.-Y. Song, W.-Z. Jia, Y. Li, X.-H. Xia, Q.-J. Wang, J.-W. Zhao and Y.-D. Yan, *Adv. Funct. Mater.*, 2007, **17**, 2808–2814.
- (S4) Y. Zhou, H. Sun, H. Xu, S. Matysiak, J. Ren and X. Qu, *Angew. Chem. Int. Ed.*, 2018, **57**, 16791–16795.
- (S5) E. Miliutina, O. Guselnikova, A. Kushnarenko, P. Bainova, P. Postnikov, V. Hnatowicz, V. Svorcik and O. Lyutakov, *ACS Sens.*, 2020, **5**, 50–56.
- (S6) H. Lian, S. Huang, X. Wei, J. Guo, X. Sun and B. Liu, *Talanta*, 2020, **210**, 120654.
- (S7) S. Zhou, J. Guo, Z. Dai, C. Liu, J. Zhao, Z. Gao and Y.-Y. Song, *Anal. Chem.*, 2021, **93**, 12067–12074.
- (S8) Y. Song, S. Lu, J. Hai, K. Liang, S. Sun, G. Meng and B. Wang, *Anal. Chem.*, 2021, **93**, 11470–11478.
